# Supplementary material for: Polarized fluorescence of a crystal having uniaxially oriented molecules by a carbazole-diyl-bridged macrocage
Source: Royal Society of Chemistry journal article supplement (doi:10.1039/c9ce00706g), 2019-01-01
Supplement: c9ce00706g1.pdf [file c9ce00706g1.pdf]

## Supplementary Information

### Polarized Fluorescence of a Crystal having Uniaxially Oriented Molecules by a Carbazole-diyl-bridged Macrocage

Hikaru Hashimoto,<sup>a</sup> Yusuke Inagaki,<sup>a</sup> Hiroyuki Momma,<sup>c</sup> Eunsang Kwon,<sup>c</sup>  
Kentaro Yamaguchi,<sup>b</sup> and Wataru Setaka<sup>\*,a,d</sup>

<sup>a</sup>*Division of Applied Chemistry, Faculty of Urban Environmental Sciences, Tokyo Metropolitan University, Hachioji, Tokyo 192-0397, Japan*

<sup>b</sup>*Faculty of Pharmaceutical Sciences at Kagawa Campus, Tokushima Bunri University, 1314-1 Shido, Sanuki, Kagawa 769-2193, Japan.*

<sup>c</sup>*Research and Analytical Center for Giant Molecules, Graduate School of Science, Tohoku University, Aoba-ku, Sendai, 980-8578, Japan*

<sup>d</sup>*Research Center for Hydrogen Energy-Based Society (ReHES), Tokyo Metropolitan University, Hachioji, Tokyo 192-0397, Japan.*

E-mail: wsetaka@tmu.ac.jp

(Total 19 pages including this cover page)

1. Experimental Procedure
2. Copies of NMR and HRMS Spectra for New Compounds
3. Details of X-ray Crystallography
4. Details of Solid-state <sup>2</sup>H NMR Study of C18Car-*d*<sub>6</sub>
5. Details of Fluorescence Study
6. Details of DFT Calculations

## 1. Experimental Procedure

All reactions were conducted under an argon atmosphere. The chemical shifts of  $^1\text{H}$  and  $^{13}\text{C}$  NMR spectra are based on the residual solvent resonances, except for  $^{29}\text{Si}$  NMR, in which the chemical shifts were referenced to external tetramethylsilane. HRMS analyses were carried out by electrospray ionization (ESI) using a FT-ICR-MS system. The sample solutions for HRMS were prepared in a mixture of chloroform/methanol with a small amount of NaI. Preparatory GPC was carried out using a recycling preparative chromatograph; chloroform stabilized with ethanol was used as the eluent. Fluorescence studies in solution were carried out with samples thoroughly degassed by several freeze–pump–thaw sequences. Solid state  $^2\text{H}$  NMR were recorded using quadrupolar echo pulse sequences. Commercially available reagents were used without further purification.

**Synthesis of 9-Methyl-2,7-bis(trimethylsilyl)carbazole (TMSCar)** A solution of 9-Methyl-2,7-dibromocarbazole (0.85 g, 2.51 mmol) dissolved in tetrahydrofuran (50 mL) was prepared. Subsequently, *n*-BuLi solution (1.6 M in hexane, 3.5 mL, 2.2 equiv.) was added slowly at  $-78\text{ }^\circ\text{C}$  with stirring for 10 min. Trimethylchlorosilane (0.70 g, 23.6 mmol) was then added as the temperature of the reaction was slowly *raised* to room temperature, and stirred for 18h. The mixture was extracted with hexane and volatile materials were removed *in vacuo*. After column chromatography purification of crude products, the pure compound, **TMSCar** (0.60 g, 1.84 mmol), was obtained as colorless crystals with 73% yield. **TMSCar**: mp 117-118  $^\circ\text{C}$ ; a white solid;  $^1\text{H}$  NMR ( $\text{CDCl}_3$ , 500 MHz)  $\delta$  0.37 (s, 18H, Si- $(\text{CH}_3)_3$ ), 3.90 (s, 3H, N- $\text{CH}_3$ ), 7.37 (d,  $J = 8.0$  Hz, 2H, Cz-*H*), 7.54 (s, 2H, Cz-*H*), 8.08 (d,  $J = 8.0$  Hz, 2H, Cz-*H*);  $^{13}\text{C}$  NMR ( $\text{CDCl}_3$ , 126 MHz)  $\delta$  -0.7 (6C), 29.0 (1C), 113.1 (2C), 119.7 (2C), 123.2 (2C), 123.5 (2C), 137.8 (2C), 140.7 (2C);  $^{29}\text{Si}$  NMR( $\text{CDCl}_3$ , 99 MHz)  $\delta$  -3.2; HRMS (ESI positive) calcd for  $\text{C}_{19}\text{H}_{27}\text{NSi}_2\text{Na}$ : 348.15742 (M+Na $^+$ ), found: 348.15744 (M+Na $^+$ ).

**Synthesis of 9-Methyl-2,7-bis(tri-9-decenylsilyl)carbazole (2)** The same procedure in the synthesis of **TMSCar** from 9-Methyl-2,7-dibromocarbazole (3.33 g, 9.82 mmol), tetrahydrofuran

(60 mL), *n*-BuLi solution (1.6 M in hexane, 13.5 mL, 2.2 equiv.), and tris(9-decenyl)chlorosilane (9.50 g, 23.6 mmol) was performed for the production of 2,7-Bis(tri-9-decenylsilyl)-9-methylcarbazole. The product (3.50 g, 3.27 mmol) was obtained as a colorless oil in 30% yield. **2**: a colorless oil; <sup>1</sup>H NMR (CDCl<sub>3</sub>, 500 MHz) δ 0.85-0.95 (m, 12H), 1.30-1.38 (m, 72H), 2.06 (q, *J* = 7.0 Hz, 12H), 3.92 (s, 3H), 4.95 (d, *J* = 10.0 Hz, 6H), 5.01 (d, *J* = 17.0 Hz, 6H), 5.83 (ddt, *J* = 17.0, 10.0, 7.0 Hz, 6H), 7.37 (d, *J* = 7.5 Hz, 2H, *Cz-H*), 7.53 (s, 2H, *Cz-H*), 8.10 (d, 7.5 Hz, 2H, *Cz-H*); <sup>13</sup>C NMR (CDCl<sub>3</sub>, 126 MHz) δ 12.7 (6C), 23.9 (6C), 28.9 (6C), 28.9 (1C), 29.2 (6C), 29.2 (6C), 29.3 (6C), 29.4 (6C), 33.8 (6C), 114.1 (6C), 116.1 (2C), 119.6 (2C), 123.7 (2C), 124.8 (2C), 135.7 (2C), 139.2 (6C), 139.3 (2C); <sup>29</sup>Si NMR (CDCl<sub>3</sub>, 99 MHz) δ -1.2; HRMS (ESI positive) calcd for C<sub>73</sub>H<sub>123</sub>NSi<sub>2</sub>Na: 1092.90863 (M+Na<sup>+</sup>), found: 1092.90874 (M+Na<sup>+</sup>).

**Synthesis of Molecular Gyrotop C18Car and its isomer C18iCar** A solution of 2,7-(tri-7-octenylsilyl)-9-methylcarbazole (**2**) (0.960 g, 0.90 mmol) in dichloromethane (200 mL) was added to a dichloromethane (700 mL) solution of first-generation Grubbs' catalyst (0.05 g, 0.06 mmol) dropwise while stirring for 12 h. The mixture was further stirred for another 12 h. The volatile materials were removed *in vacuo*, and the catalyst was removed from the toluene-soluble fraction by column chromatography. The reaction mixture was then added with toluene (15 mL) and placed in an autoclave together with 10% Pd/C (0.030 g). Subsequently, hydrogen gas (3 atm) was introduced. The mixture was left for 72 h, and then filtered to remove the Pd/C. The fractions containing **C18Car** and **C18iCar** were collected separately by GPC (chloroform), and the solvents were evaporated. The pure compound **C18Car** (0.030 g, 0.033 mmol, 3.0% yield) was obtained as colorless crystals by recrystallization from THF/methanol (4:1). Pure compound **C18iCar** (0.340 g, 0.34 mmol, 34% yield) was obtained without further purification. **C18Car**: colorless crystals; mp 220-221 °C; <sup>1</sup>H NMR (CDCl<sub>3</sub>, 500 MHz) δ 0.81-0.84 (m, 12H), 1.16-1.34 (m, 96H), 3.91(s, 3H, N-CH<sub>3</sub>), 7.34 (d, *J* = 7.5 Hz, 2H, *Cz-H*), 7.53 (s, 2H, *Cz-H*), 8.05 (d, *J* = 7.5 Hz, 2H, *Cz-H*); <sup>13</sup>C NMR (CDCl<sub>3</sub>, 126 MHz) δ 13.0 (6C), 23.3 (6C), 28.2 (6C), 28.6 (6C), 28.7 (1C), 29.4 (6C), 29.5 (6C), 29.9 (6C), 29.9(6C) 32.8 (6C), 116.7 (2C), 119.5 (2C), 123.6 (2C), 125.2 (2C), 135.3 (2C), 139.2 (2C); <sup>29</sup>Si NMR (CDCl<sub>3</sub>, 99 MHz) δ -0.7; HRMS (ESI positive) calcd for C<sub>67</sub>H<sub>117</sub>NSi<sub>2</sub>Na:

1014.86168 (M+Na<sup>+</sup>), found: 1014.86160 (M+Na<sup>+</sup>). **C18iCar**: a colorless oil; <sup>1</sup>H NMR (CDCl<sub>3</sub>, 500 MHz)  $\delta$  0.70-0.76 (m, 4H), 0.80-1.00 (m, 8H) 1.15-1.25 (m, 32H), 1.26-1.46 (m, 64H), 3.91(s, 3H, N-CH<sub>3</sub>), 7.33 (d,  $J$  = 7.5 Hz, 2H, Cz-H), 7.50 (s, 2H, Cz-H), 8.07 (d,  $J$  = 7.5 Hz, 2H, Cz-H); <sup>13</sup>C NMR (CDCl<sub>3</sub>, 126 MHz)  $\delta$  12.1, 13.8, 23.5, 23.6, 27.3, 27.6, 28.1, 28.2, 28.5, 28.5, 28.9, 28.9, 29.0, 29.0, 29.4, 29.5, 29.6, 33.3, 33.6, 113.8 (2C), 119.6 (2C), 123.1 (2C), 124.3 (2C), 135.5 (2C), 140.7 (2C); <sup>29</sup>Si NMR (CDCl<sub>3</sub>, 99 MHz)  $\delta$  -0.6; HRMS (ESI positive) calcd for C<sub>67</sub>H<sub>117</sub>NSi<sub>2</sub>Na: 1014.86168 (M+Na<sup>+</sup>), found: 1014.86171 (M+Na<sup>+</sup>).

**Synthesis of Deuterated Molecular Gyrotop C18Car-d<sub>6</sub>** Deuterated molecular gyrotop **C18Car-d<sub>6</sub>** was synthesized using the same procedure as **C18Car**. **C18Car-d<sub>6</sub>**: colorless crystals; mp 221-222 °C; <sup>1</sup>H NMR (CDCl<sub>3</sub>, 500 MHz)  $\delta$  0.75-0.85 (m, 12H), 1.10-1.38 (m, 96H), 7.98 (s, 1H, N-H); <sup>13</sup>C NMR (CDCl<sub>3</sub>, 126 MHz)  $\delta$  13.1 (6C), 23.3 (6C), 28.3 (6C), 28.7 (6C), 29.4 (6C), 29.5 (6C), 29.9 (6C), 29.9 (6C), 32.9 (6C), 116.3 (t,  $J$  = 23.5 Hz, 2C), 119.2 (t,  $J$  = 23.5 Hz, 2C), 123.5 (s, 2C), 124.8 (t,  $J$  = 23.5 Hz, 2C), 135.0 (s, 2C), 139.2 (s, 2C); <sup>29</sup>Si NMR (CDCl<sub>3</sub>, 99 MHz)  $\delta$  -0.7; HRMS (ESI positive) calcd for C<sub>67</sub>H<sub>111</sub>D<sub>6</sub>NSi<sub>2</sub>Na: 1020.89934 (M+Na<sup>+</sup>), found: 1020.89960 (M+Na<sup>+</sup>)

## 2. Copies of NMR and HRMS Spectra for New Compounds

### a. Spectra of TMSCar

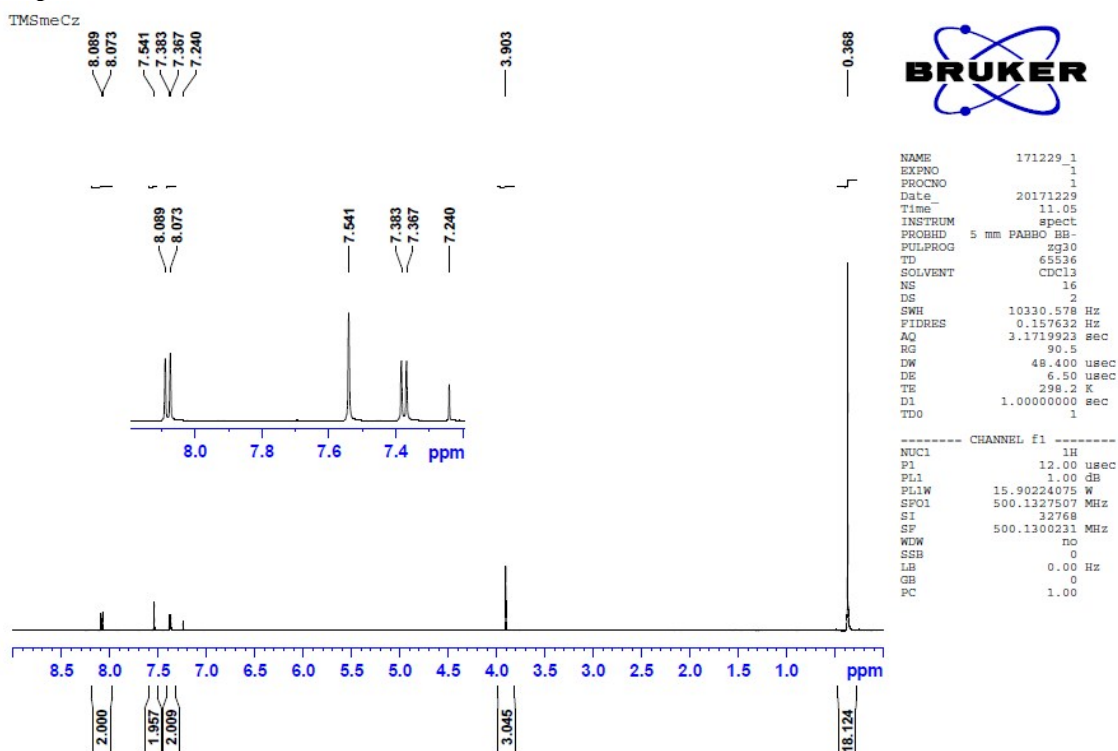

Fig. S1. <sup>1</sup>H NMR spectrum of TMSCar in CDCl<sub>3</sub>.

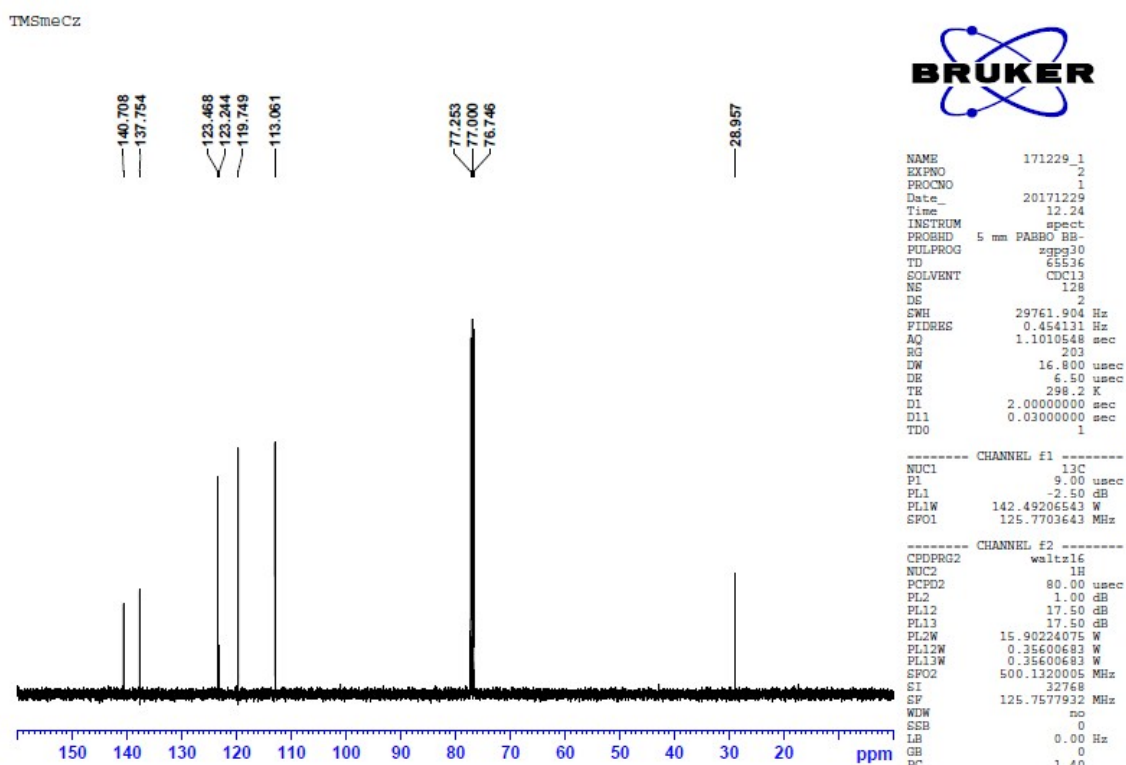

Fig. S2. <sup>13</sup>C NMR spectrum of TMSCar in CDCl<sub>3</sub>.

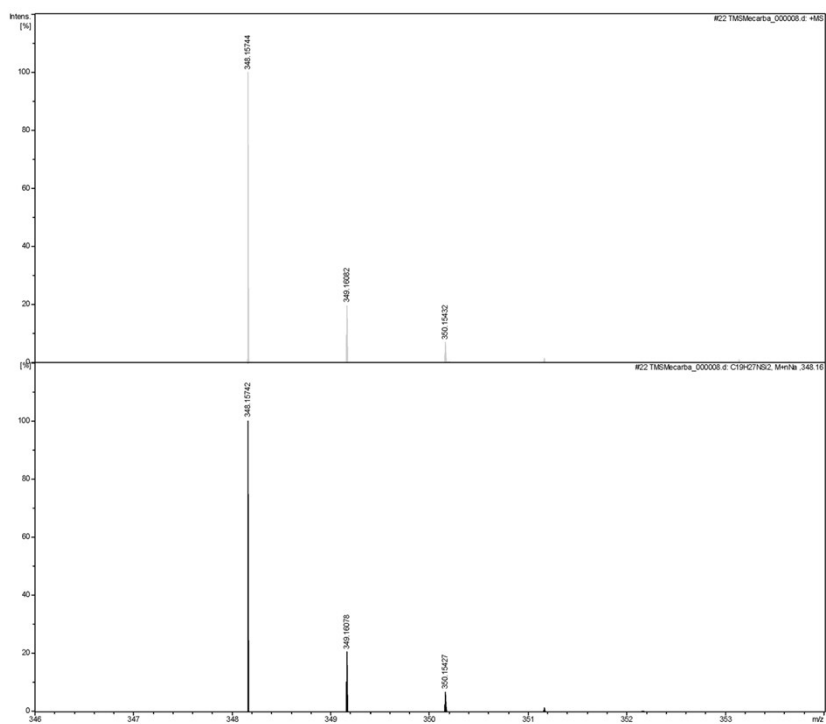

Fig. S3. HRMS spectrum of TMSCar (ESI, positive). Top: obsd. Bottom: sim.

## b. Spectra of 2

C10-N-methylcarbazole-C10

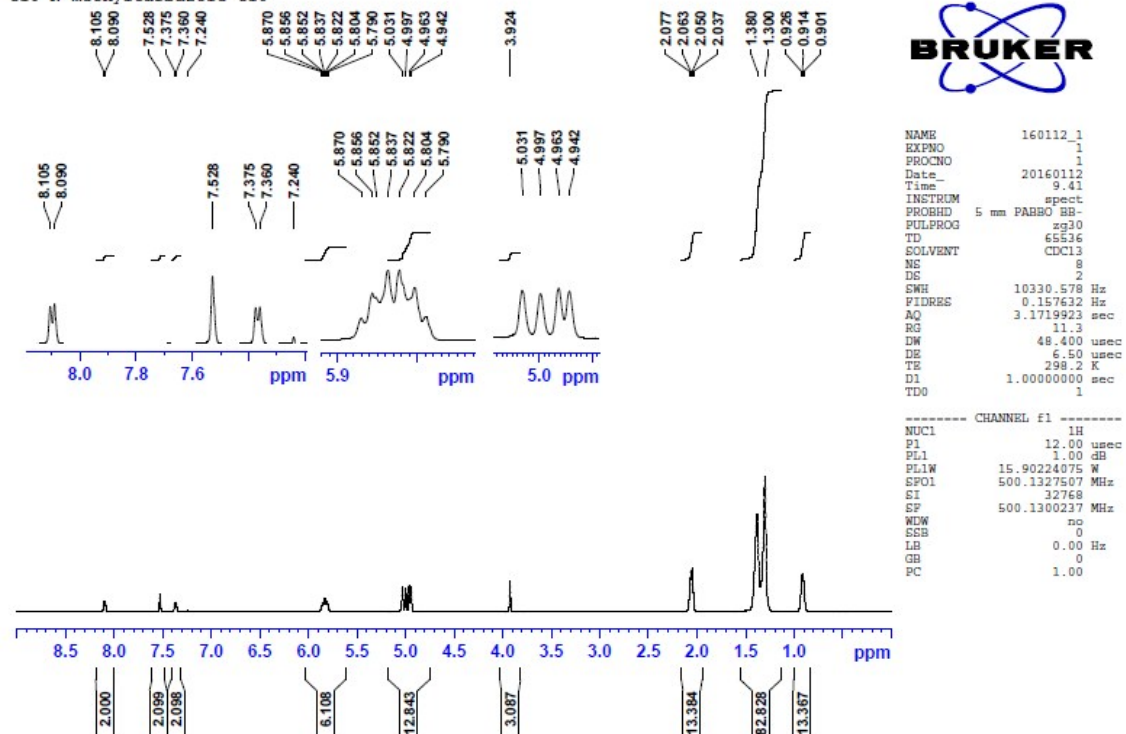

Fig. S4.  $^1\text{H}$  NMR spectrum of **2** in  $\text{CDCl}_3$ .

C10-N-methylcarbazole-C10

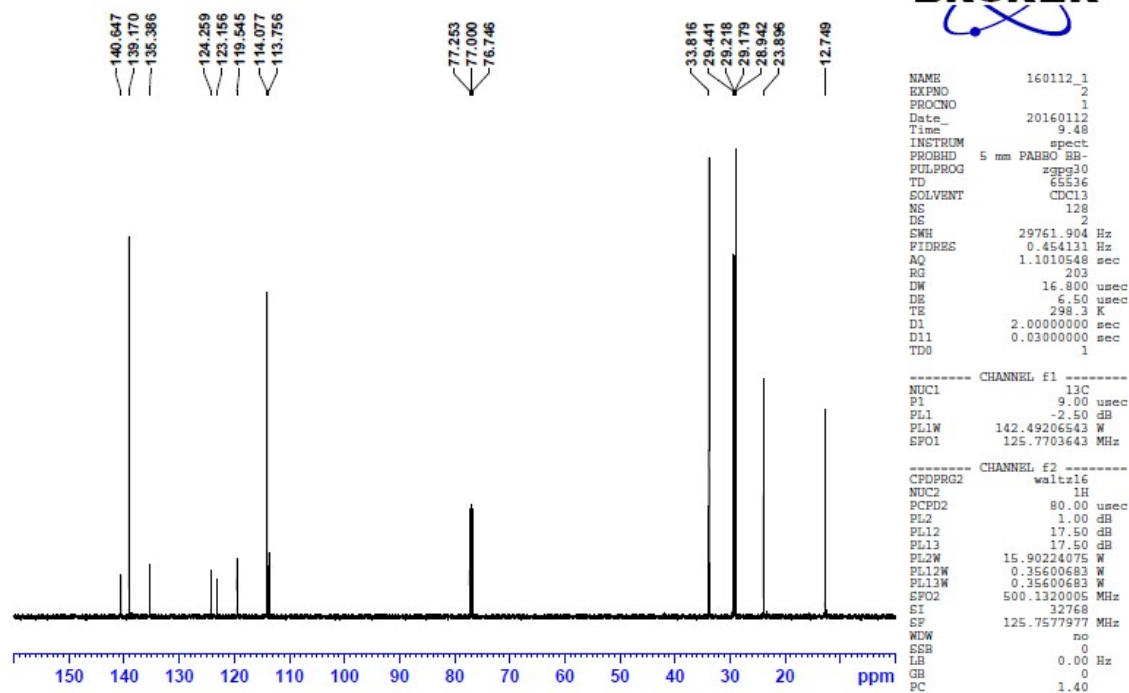

Fig. S5.  $^{13}\text{C}$  NMR spectrum of **2** in  $\text{CDCl}_3$ .

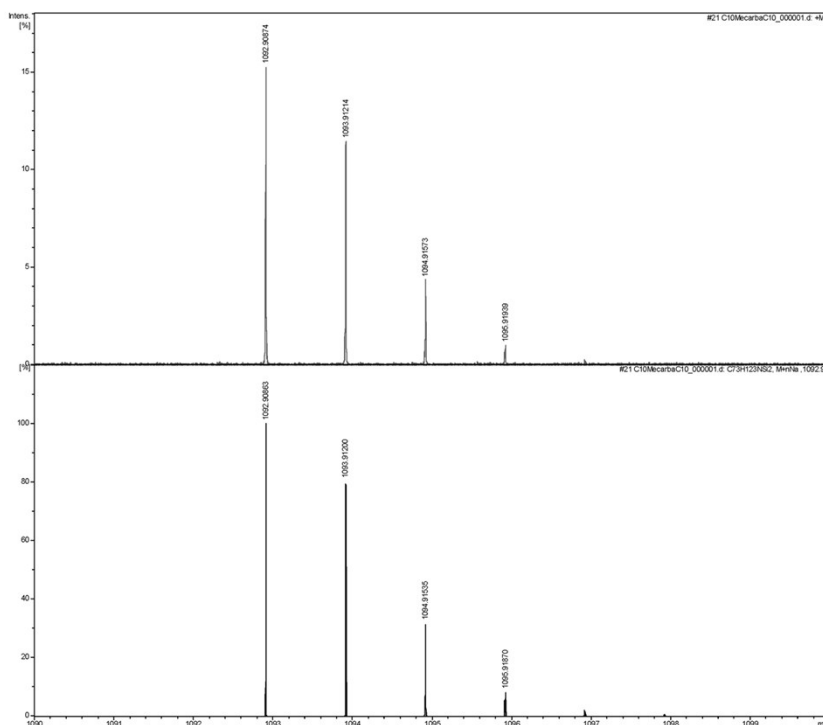

Fig. S6. HRMS spectrum of **2** (ESI, positive). Top: obsd. Bottom: sim.

### c. Spectra of C18Car

C18 N-methylcarbazole sat.cage

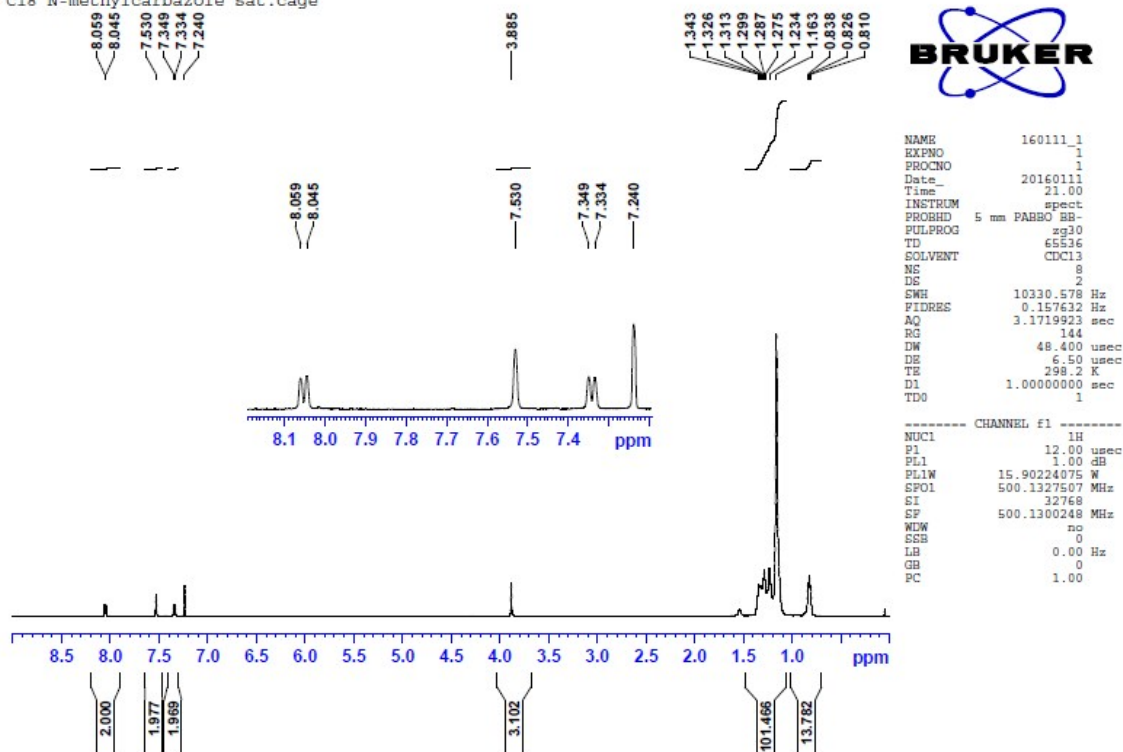

Fig. S7. <sup>1</sup>H NMR spectrum of C18Car in CDCl<sub>3</sub>.

C18 N-methylcarbazole sat.cage

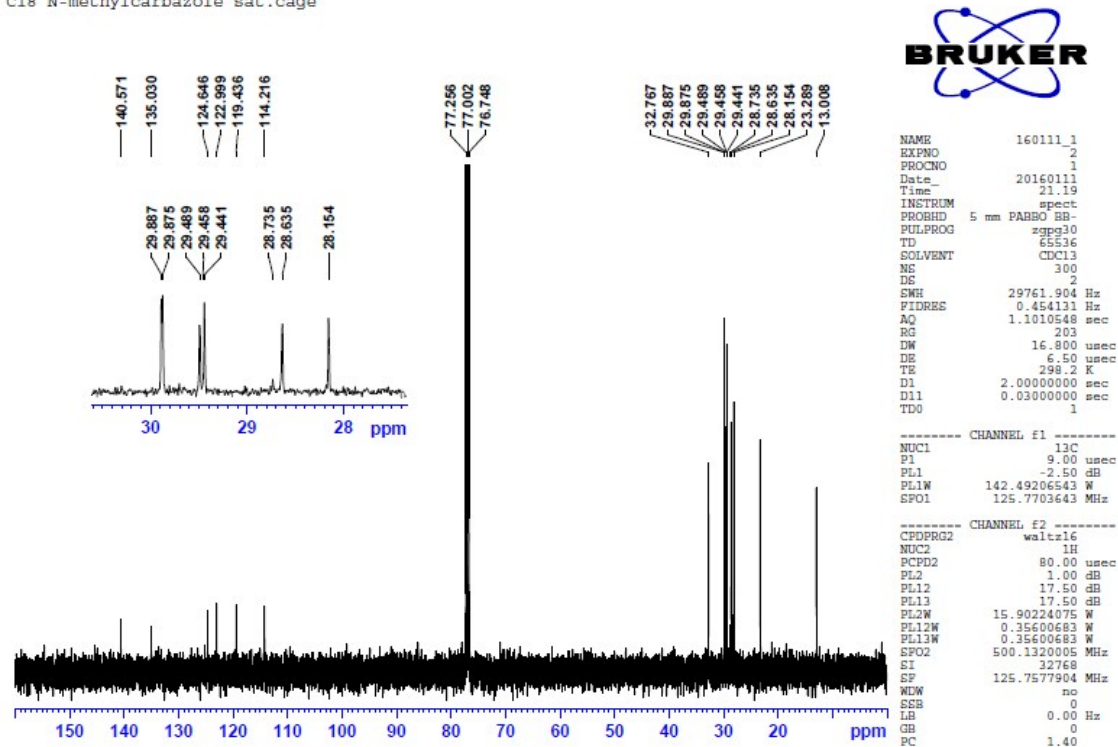

Fig. S8. <sup>13</sup>C NMR spectrum of C18Car in CDCl<sub>3</sub>.



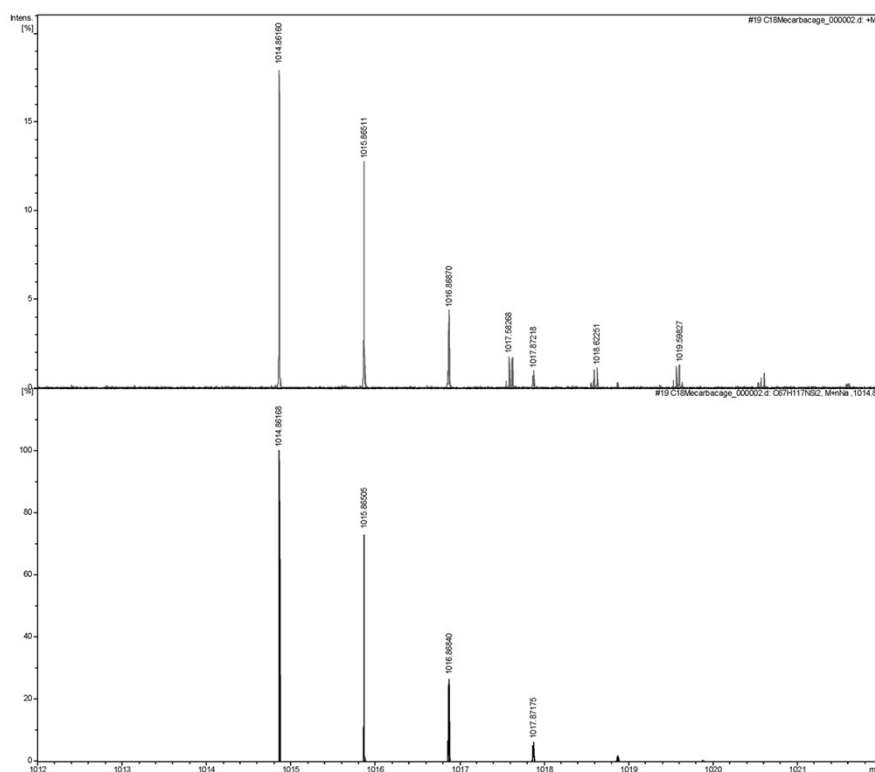

Fig. S9. HRMS spectrum of C18Car (ESI, positive). Top: obsd. Bottom: sim.

#### d. Spectra of C18Cari

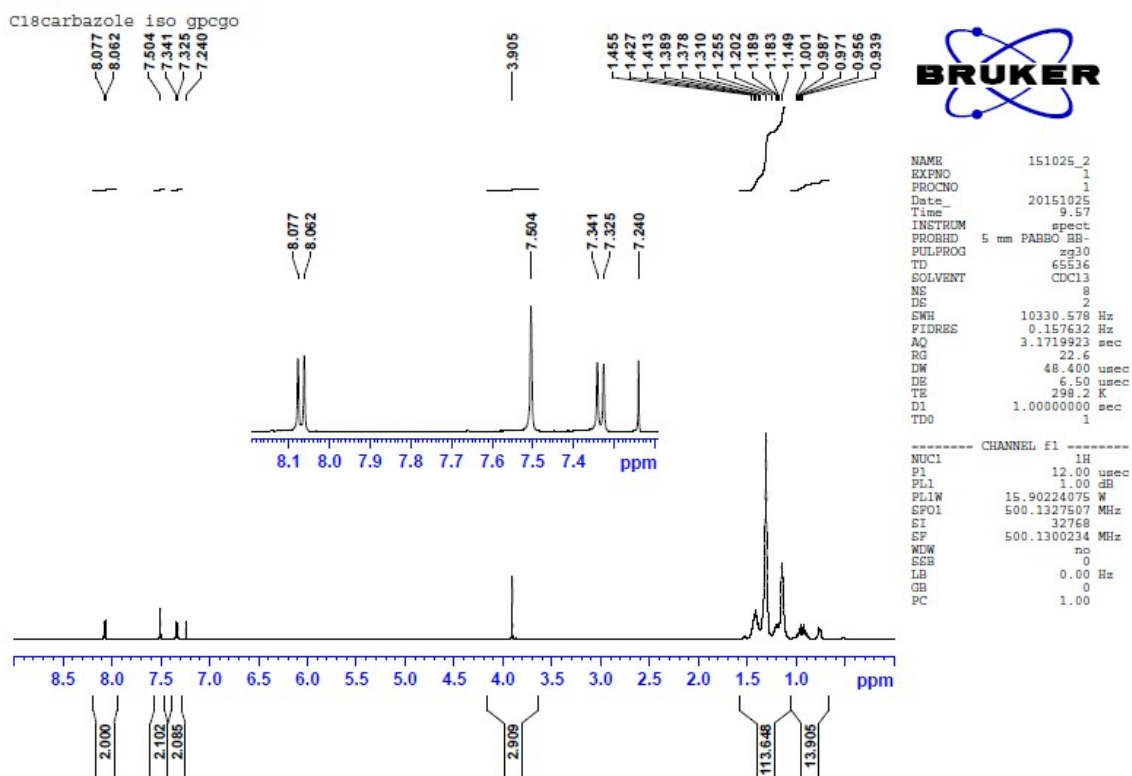

Fig. S10. <sup>1</sup>H NMR spectrum of C18Cari in CDCl<sub>3</sub>.

C18carbazole iso gpcgo

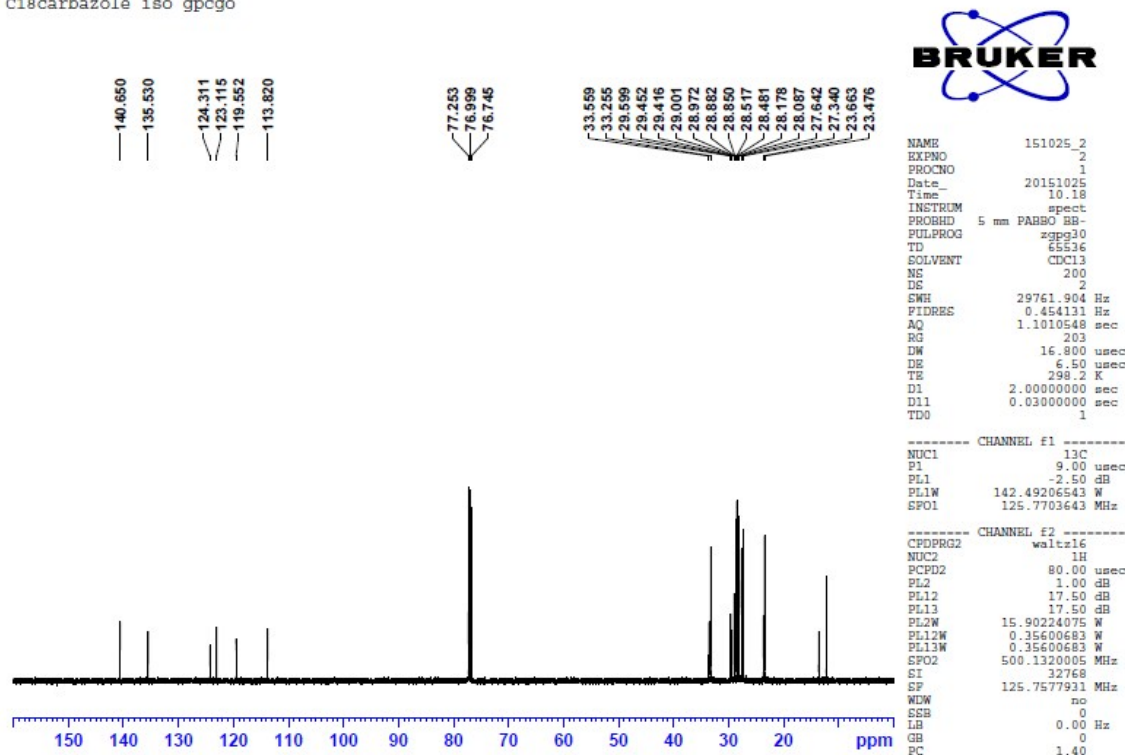

Fig. S11. <sup>13</sup>C NMR spectrum of C18Cari in CDCl<sub>3</sub>.

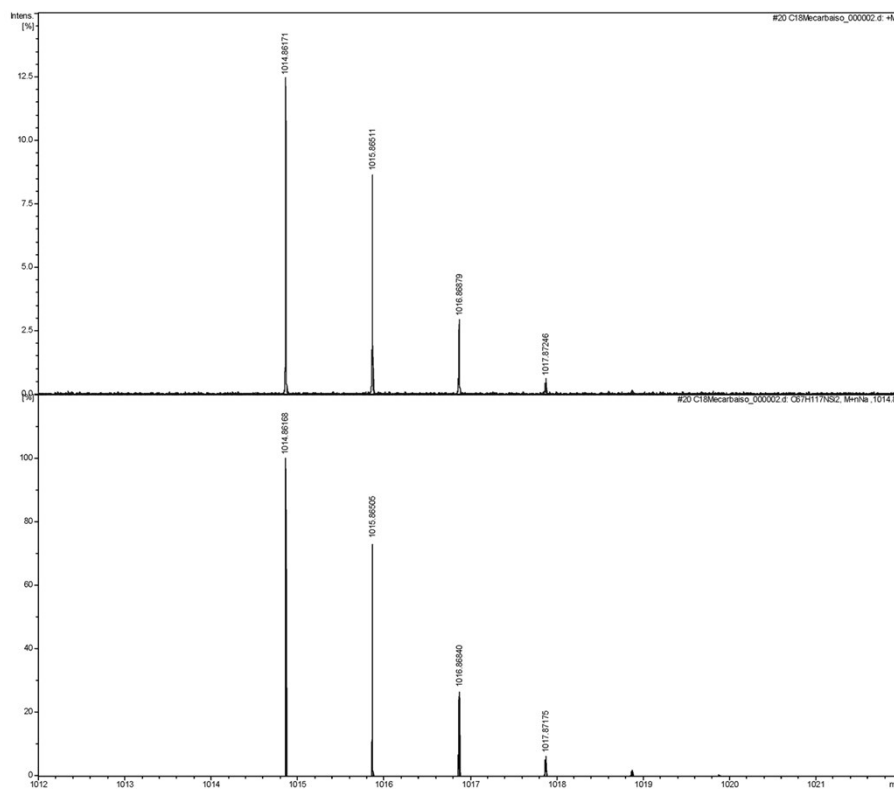

Fig. S12. HRMS spectrum of C18Cari (ESI, positive). Top: obsd. Bottom: sim.

e. Spectra of C18Car-*d*<sub>6</sub>

C10-N-methylcarbazole-*d*<sub>6</sub>-C10

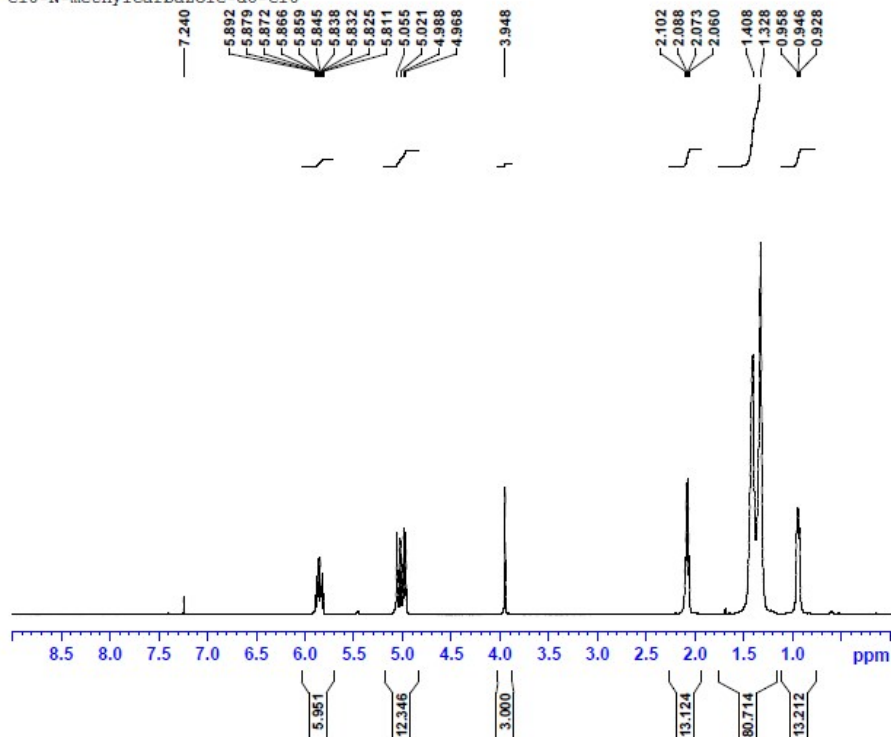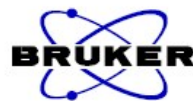

```

NAME          160617_1
EXPNO         1
PROCNO        1
Date_         20160617
Time          11.32
INSTRUM       spect
PROBHD        5 mm PABBO BB-
PULPROG       zg30
TD            65536
SOLVENT       CDCl3
NS            16
DS            2
SWH           10330.578 Hz
FIDRES        0.157632 Hz
AQ            3.1719923 sec
RG            11.3
DW            48.400 usec
DE            6.50 usec
TE            298.2 K
D1            1.00000000 sec
TDO           1
  
```

```

----- CHANNEL f1 -----
NUC1          1H
P1            12.00 usec
PL1           1.00 dB
PL1W          15.90224075 W
SFO1          500.1327507 MHz
SI            32768
SF            500.1300231 MHz
WDW           no
SSB           0
LB            0.0 Hz
GB            0
PC            1.00
  
```

Fig. S13. <sup>1</sup>H NMR spectrum of C18Car-*d*<sub>6</sub> in CDCl<sub>3</sub>.

C10-N-methylcarbazole-*d*<sub>6</sub>-C10

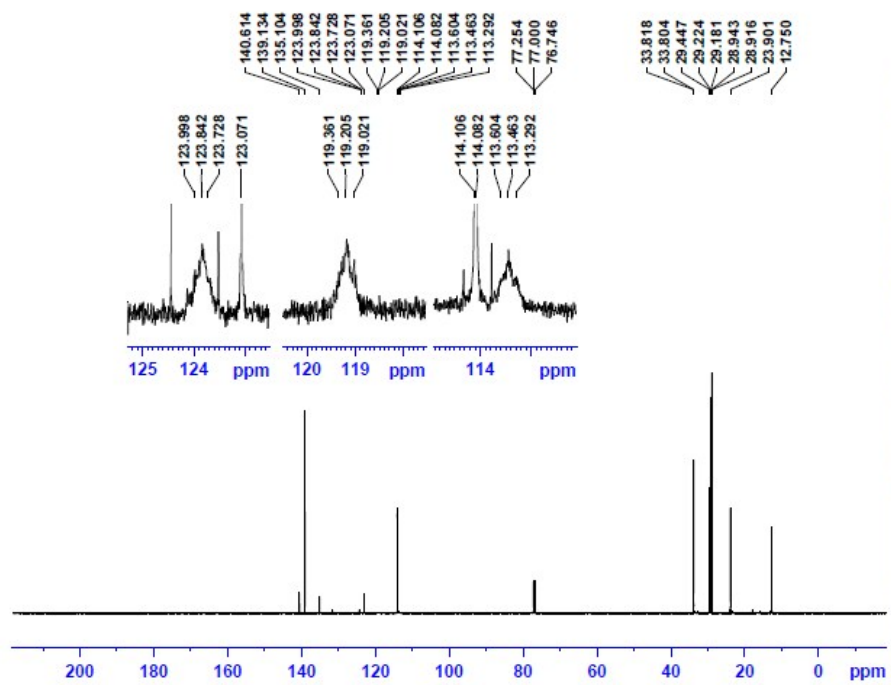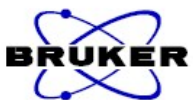

```

NAME          160617_1
EXPNO         2
PROCNO        1
Date_         20160617
Time          12.35
INSTRUM       spect
PROBHD        5 mm PABBO BB-
PULPROG       zgpg30
TD            65536
SOLVENT       CDCl3
NS            1151
DS            2
SWH           29761.904 Hz
FIDRES        0.454131 Hz
AQ            1.1010548 sec
RG            203
DW            16.800 usec
DE            6.50 usec
TE            298.2 K
D1            2.00000000 sec
D11           0.03000000 sec
TDO           1
  
```

```

----- CHANNEL f1 -----
NUC1          13C
P1            9.00 usec
PL1           2.50 dB
PL1W          142.49206543 W
SFO1          125.7703643 MHz
  
```

```

----- CHANNEL f2 -----
CPDPRG2       waltz16
NUC2          1H
PCPD2         80.00 usec
PL2           1.00 dB
PL12          17.50 dB
PL13          17.50 dB
PL2W          15.90224075 W
PL12W         0.35600683 W
PL13W         0.35600683 W
SFO2          500.1320005 MHz
SI            32768
SF            125.7578013 MHz
WDW           no
SSB           0
LB            0.00 Hz
GB            0
PC            1.40
  
```

Fig. S14. <sup>13</sup>C NMR spectrum of C18Car-*d*<sub>6</sub> in CDCl<sub>3</sub>.

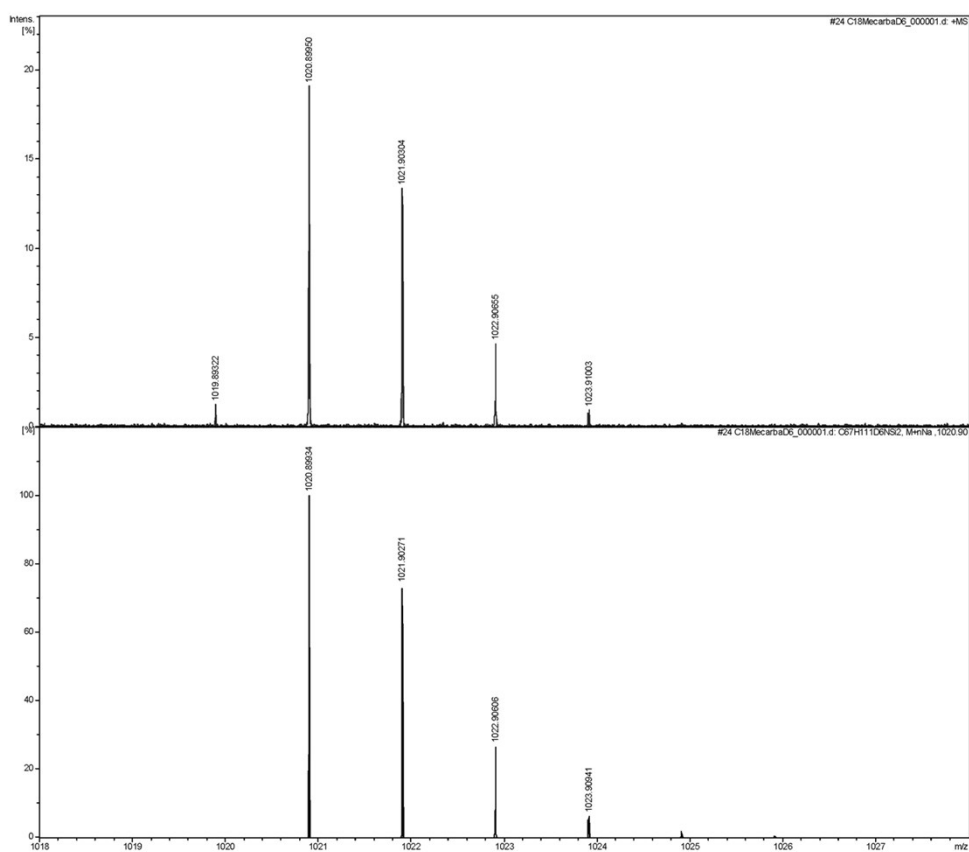

**Fig. S15.** HRMS spectrum of bromosilylthiophene **C18Car-d<sub>6</sub>** (ESI, positive). Top: obsd. Bottom: sim.

### 3. Details of X-ray Crystallography

#### 3-1. Crystal Data

Table S1. Crystal Data

| Sample                               | C18Car                                                        | TMSCar                                                      |                           |
|--------------------------------------|---------------------------------------------------------------|-------------------------------------------------------------|---------------------------|
| CCDC #                               | 1825557                                                       | 1825558                                                     |                           |
| Empirical formula                    | C <sub>67</sub> H <sub>117</sub> N Si <sub>2</sub>            | C <sub>19</sub> H <sub>27</sub> N Si <sub>2</sub>           |                           |
| Crystal shape                        | prism                                                         | prism                                                       |                           |
| Crystal color                        | colorless                                                     | colorless                                                   |                           |
| Crystal size                         | 0.40 x 0.40 x 0.20 mm <sup>3</sup>                            | 0.27 x 0.22 x 0.19 mm <sup>3</sup>                          |                           |
| Formula weight / g mol <sup>-1</sup> | 992.79                                                        | 325.59                                                      |                           |
| Crystal system                       | Monoclinic                                                    | Monoclinic                                                  |                           |
| Space group                          | <i>C</i> <sub>2</sub> / <i>c</i>                              | <i>P</i> <sub>2</sub> / <i>1</i> / <i>n</i>                 |                           |
| Z                                    | 4                                                             | 4                                                           |                           |
| Calculated density                   | 1.017 Mg/m <sup>3</sup>                                       | 1.093 Mg/m <sup>3</sup>                                     |                           |
| Cell parameter                       | <i>a</i>                                                      | 34.673(6) Å                                                 | 15.104(7) Å               |
|                                      | <i>b</i>                                                      | 12.090(2) Å                                                 | 6.317(4) Å                |
|                                      | <i>c</i>                                                      | 17.728(3) Å                                                 | 20.8662(10) Å             |
|                                      | $\alpha$                                                      | 90°                                                         | 90°                       |
|                                      | $\beta$                                                       | 119.214(2)°                                                 | 96.345(11)°               |
|                                      | $\gamma$                                                      | 90°                                                         | 90°                       |
|                                      | <i>V</i>                                                      | 6486.4(19) Å <sup>3</sup>                                   | 1978.7(16) Å <sup>3</sup> |
| F(000)                               | 2216                                                          | 704                                                         |                           |
| Absorption coefficient               | 0.091 mm <sup>-1</sup>                                        | 0.177 mm <sup>-1</sup>                                      |                           |
| $\theta$ range for collection (deg)  | 1.346 to 27.369°                                              | 3.105 to 27.516°                                            |                           |
| Index ranges                         | -32 ≤ <i>h</i> ≤ 43, -14 ≤ <i>k</i> ≤ 14, -21 ≤ <i>l</i> ≤ 19 | -19 ≤ <i>h</i> ≤ 19, -5 ≤ <i>k</i> ≤ 8, -27 ≤ <i>l</i> ≤ 27 |                           |
| Reflections collected                | 16192                                                         | 18281                                                       |                           |
| Independent reflections              | 6658 [R(int) = 0.0342]                                        | 4510 [R(int) = 0.0974]                                      |                           |
| Completeness                         | 99.9 %                                                        | 99.5 %                                                      |                           |
| Goodness-of-fit on F <sup>2</sup>    | 1.291                                                         | 0.889                                                       |                           |
| Final R indices [I > 2σ(I)]          | R1 = 0.1083, wR2 = 0.3444                                     | R1 = 0.0487, wR2 = 0.1114                                   |                           |
| R indices (all data)                 | R1 = 0.1726, wR2 = 0.3993                                     | R1 = 0.0605, wR2 = 0.1140                                   |                           |
| Largest diff. peak and hole          | 1.050 and -0.349 e.Å <sup>-3</sup>                            | 0.263 and -0.322 e.Å <sup>-3</sup>                          |                           |

### 3-2. Disorder of Carbazole Moieties in C18Car

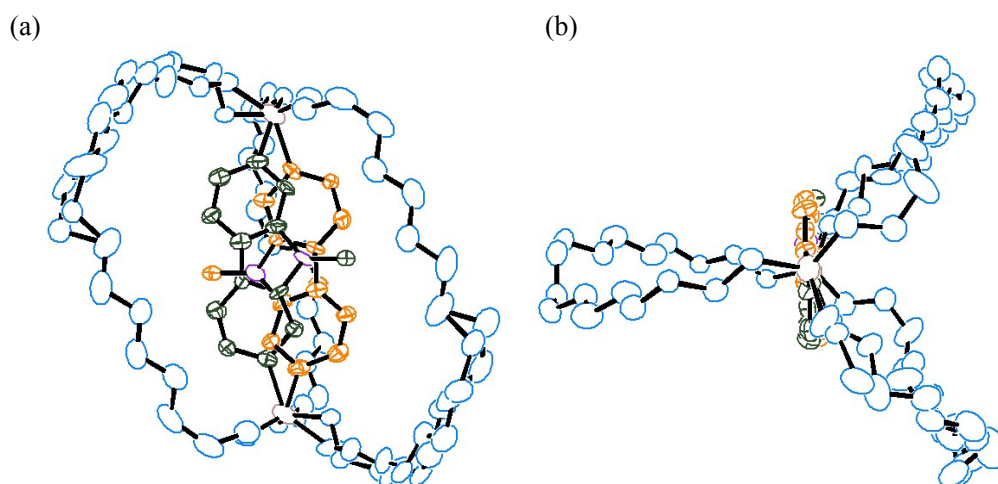

**Fig. S16.** Disorder in C18Car: (a) equatorial view; (b) axial view.

#### 4. Details of Solid-state $^2\text{H}$ NMR Study of $\text{C18Car-}d_6$

Solid-state  $^2\text{H}$  NMR was employed to observe dynamics of the carbazole moiety in a crystalline state of  $\text{C18Car-}d_6$ . In this spectra, the molecular motion of the deuterated moieties can be observed selectively. Fig. S17 shows temperature dependent solid-state  $^2\text{H}$  NMR spectra of the powdered samples. Broad signals due to quadrupole coupling, called a Pake doublet, were observed, indicating the rotor was almost static.

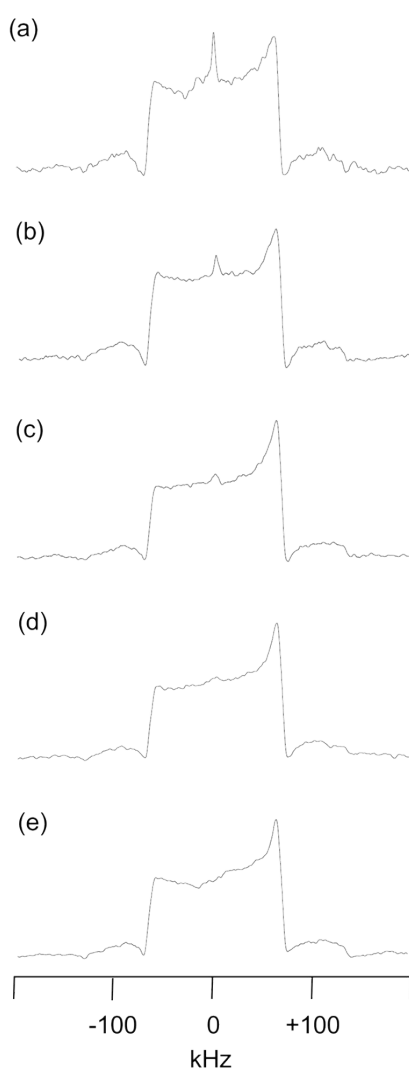

**Fig. S17.** Temperature dependent solid-state  $^2\text{H}$  NMR spectra of  $\text{C18Car-}d_6$ : (a) 330 K, (b) 320 K, (c) 310 K, (d) 300 K, (e) 290 K.

## 5. Details of Fluorescence Study

### 4-1. Fluorescence Parameters

**Table S2.** Fluorescence Parameters of Silylcarbazoles

| compound    | $\lambda_{abs}$ / nm | $\lambda_{emi}$ / nm | Storks Shift<br>$\Delta\lambda$ / nm | Quantumn          | Lifetime<br>$\tau$ / ns |       |
|-------------|----------------------|----------------------|--------------------------------------|-------------------|-------------------------|-------|
|             |                      |                      |                                      | Yield<br>$\Phi_f$ |                         |       |
| Solution    | <b>TMSCar</b>        | 354                  | 360                                  | 6                 | 0.76                    | 15.05 |
|             | <b>C18Car</b>        | 354                  | 361                                  | 7                 | 0.65                    | 15.40 |
| Solid state | <b>TMSCar</b>        | 370                  | 386                                  | 16                | 0.28                    | 10.53 |
|             | <b>C18Car</b>        | 364                  | 381                                  | 17                | 0.08                    | 6.61  |

### 4-2. Details of Solid-State Fluorescence Studies

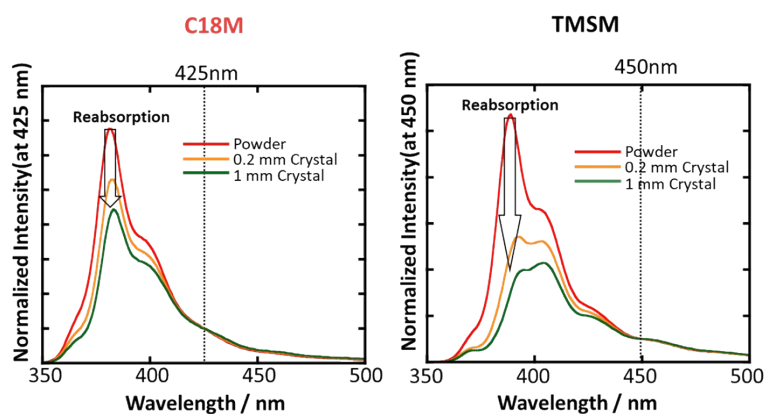

**Fig. S18.** Thickness dependent fluorescence spectra from a single crystal: **C18Car** (left), **TMSCar** (right).

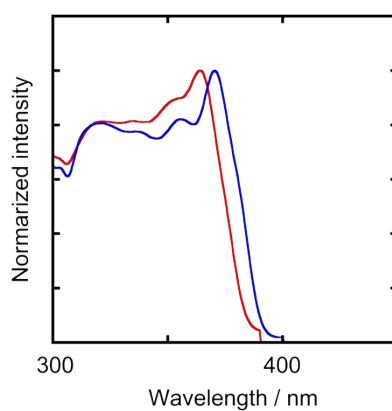

**Fig. S19.** Excitation spectra for powdered fluorescence: **C18Car** (red line,  $\lambda_{abs} = 364$  nm), **TMSCar** (blue line,  $\lambda_{abs} = 370$  nm).



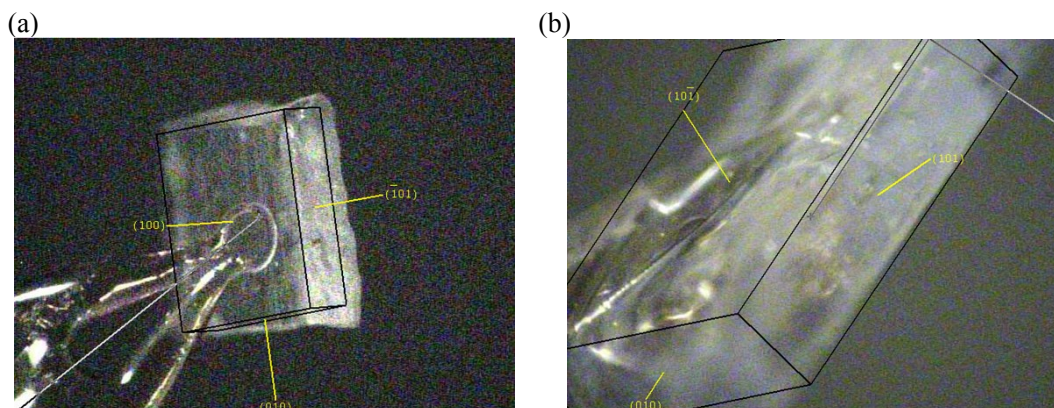

**Fig. S20.** Orientation mapping of the single crystal determined by X-ray diffraction: (a) **C18Car**, (b) **TMSCar**.

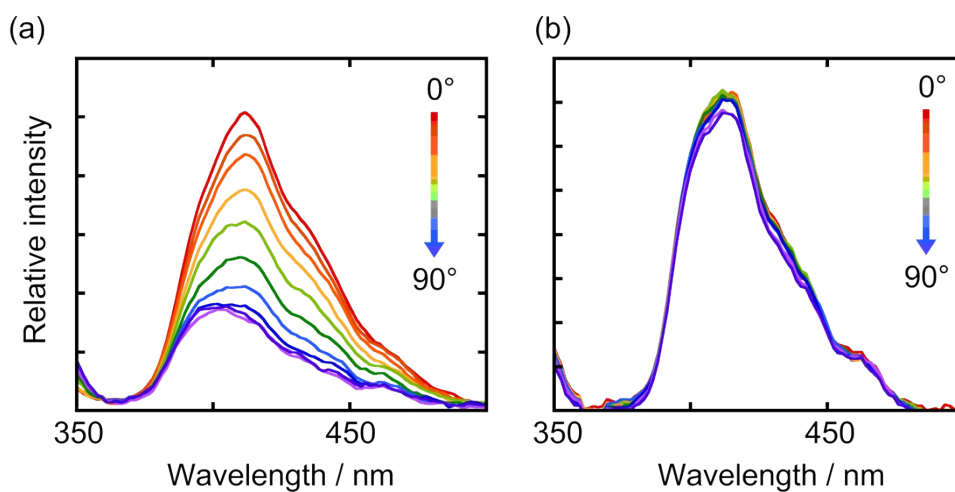

**Fig. S21.** Polarized fluorescence spectra from a single crystal of (a) **C18Car** and (b) **TMSCar**. Values of the angles were stated in the caption of Fig. 3. [Note: These spectra include optical properties of the polarizer, such as the wavelength dependence of extinction ratios. Thus, a discussion on the spectral shapes is futile. However, the intensities of fluorescence that depend on the angles at certain wavelengths reflect the magnitudes of their polarity.]

## 5. Details of DFT Calculations

### a. Optimized Structure, Total Energy, Excitation energies, and Direction of Transition Moment of 2,7-trimethylsilyl-9-methylcarbazole

All calculation were carried out using Gaussian 16 (Revision A.03) program packages<sup>S1</sup> on Fujitsu PRIMERGY CX400 supercomputer at Nagoya University ICTS and the Research Center for Computational Science, Okazaki, Japan

S1: Gaussian 16, Revision A.03,

M. J. Frisch, G. W. Trucks, H. B. Schlegel, G. E. Scuseria, M. A. Robb, J. R. Cheeseman, G. Scalmani, V. Barone, G. A. Petersson, H. Nakatsuji, X. Li, M. Caricato, A. V. Marenich, J. Bloino, B. G. Janesko, R. Gomperts, B. Mennucci, H. P. Hratchian, J. V. Ortiz, A. F. Izmaylov, J. L. Sonnenberg, D. Williams-Young, F. Ding, F. Lipparini, F. Egidi, J. Goings, B. Peng, A. Petrone, T. Henderson, D. Ranasinghe, V. G. Zakrzewski, J. Gao, N. Rega, G. Zheng, W. Liang, M. Hada, M. Ehara, K. Toyota, R. Fukuda, J. Hasegawa, M. Ishida, T. Nakajima, Y. Honda, O. Kitao, H. Nakai, T. Vreven, K. Throssell, J. A. Montgomery, Jr., J. E. Peralta, F. Ogliaro, M. J. Bearpark, J. J. Heyd, E. N. Brothers, K. N. Kudin, V. N. Staroverov, T. A. Keith, R. Kobayashi, J. Normand, K. Raghavachari, A. P. Rendell, J. C. Burant, S. S. Iyengar, J. Tomasi, M. Cossi, J. M. Millam, M. Klene, C. Adamo, R. Cammi, J. W. Ochterski, R. L. Martin, K. Morokuma, O. Farkas, J. B. Foresman, and D. J. Fox, Gaussian, Inc., Wallingford CT, 2016.

### b. Optimized Structure, Total Energy, Excitation energies, and Direction of Transition Moment of 2,7-trimethylsilyl-9-methylcarbazole at B3LYP/6-31G(d,p) level

**Table S3.** Optimized Structural Coordinate and its Total Energy at B3LYP/6-31G(d,p) level  
total energy: = -1374.1768645 hartree (NImag = 0)

| Center Number | Atomic Number | Atomic Type | Coordinates (Angstroms) |           |           |
|---------------|---------------|-------------|-------------------------|-----------|-----------|
|               |               |             | X                       | Y         | Z         |
| 1             | 6             | 0           | 6.109633                | -0.787396 | -1.389467 |
| 2             | 6             | 0           | -6.101979               | -0.774386 | -1.444270 |
| 3             | 6             | 0           | -5.544346               | 2.070938  | -0.378127 |
| 4             | 6             | 0           | 5.548690                | 2.058929  | -0.327735 |
| 5             | 6             | 0           | 3.036465                | -1.528112 | 0.319611  |
| 6             | 6             | 0           | 3.455853                | -0.194243 | 0.083977  |
| 7             | 6             | 0           | 1.693464                | -1.881744 | 0.381447  |
| 8             | 6             | 0           | 2.480572                | 0.798921  | -0.089151 |
| 9             | 6             | 0           | 0.003356                | 2.670150  | -0.426835 |
| 10            | 6             | 0           | -3.460214               | -0.186717 | 0.052769  |
| 11            | 6             | 0           | -3.045879               | -1.521493 | 0.292174  |
| 12            | 6             | 0           | -2.481257               | 0.804321  | -0.111553 |
| 13            | 6             | 0           | 0.719211                | -0.891786 | 0.208690  |
| 14            | 6             | 0           | 1.128826                | 0.448277  | -0.019240 |
| 15            | 6             | 0           | -1.704263               | -1.878032 | 0.366122  |
| 16            | 6             | 0           | -0.726342               | -0.890194 | 0.202167  |
| 17            | 6             | 0           | -1.130953               | 0.450766  | -0.029444 |
| 18            | 6             | 0           | 6.120605                | -0.243300 | 1.651304  |
| 19            | 6             | 0           | -6.139002               | -0.229598 | 1.596171  |
| 20            | 1             | 0           | 5.678911                | -0.527846 | -2.362329 |
| 21            | 1             | 0           | -5.662010               | -0.515976 | -2.413290 |
| 22            | 1             | 0           | -5.091793               | 2.376462  | -1.327699 |
| 23            | 1             | 0           | 7.187822                | -0.597150 | -1.438784 |
| 24            | 1             | 0           | -7.179268               | -0.581810 | -1.503266 |
| 25            | 1             | 0           | 5.969935                | -1.864048 | -1.244855 |
| 26            | 1             | 0           | 5.105396                | 2.365619  | -1.281290 |
| 27            | 1             | 0           | -6.611884               | 2.311479  | -0.432858 |
| 28            | 1             | 0           | -5.965924               | -1.851309 | -1.298211 |
| 29            | 1             | 0           | 0.009836                | 2.880035  | -1.504240 |
| 30            | 1             | 0           | 6.617198                | 2.297163  | -0.372771 |
| 31            | 1             | 0           | -5.110714               | 2.689122  | 0.415370  |

|    |    |   |           |           |           |
|----|----|---|-----------|-----------|-----------|
| 32 | 1  | 0 | 3.783597  | -2.306767 | 0.454380  |
| 33 | 1  | 0 | 1.403684  | -2.913903 | 0.559005  |
| 34 | 1  | 0 | 2.771438  | 1.827244  | -0.281673 |
| 35 | 1  | 0 | -3.795888 | -2.298519 | 0.420191  |
| 36 | 1  | 0 | -0.881269 | 3.135075  | 0.014473  |
| 37 | 1  | 0 | -2.768174 | 1.833256  | -0.306707 |
| 38 | 1  | 0 | -1.418330 | -2.910813 | 0.546279  |
| 39 | 1  | 0 | 5.109246  | 2.677898  | 0.461944  |
| 40 | 1  | 0 | 0.883641  | 3.133474  | 0.024773  |
| 41 | 1  | 0 | -7.216665 | -0.033707 | 1.558975  |
| 42 | 1  | 0 | 7.198993  | -0.049817 | 1.623786  |
| 43 | 1  | 0 | 5.980578  | -1.302957 | 1.890330  |
| 44 | 1  | 0 | -6.003490 | -1.289519 | 1.836622  |
| 45 | 1  | 0 | -5.721411 | 0.351462  | 2.425232  |
| 46 | 1  | 0 | 5.696917  | 0.338550  | 2.476709  |
| 47 | 7  | 0 | 0.000365  | 1.252045  | -0.143071 |
| 48 | 14 | 0 | -5.305655 | 0.222358  | -0.043931 |
| 49 | 14 | 0 | 5.302977  | 0.210809  | 0.003902  |

**Table S4.** Ground to excited state transition electric dipole moments (Au) at B3LYP/6-31G(d,p) level

| state | X       | Y       | Z       | Dip. S. | Osc.   |
|-------|---------|---------|---------|---------|--------|
| 1     | -0.0001 | -0.5713 | 0.0005  | 0.3263  | 0.0309 |
| 2     | -1.9193 | 0.0000  | 0.0000  | 3.6838  | 0.3913 |
| 3     | 2.1976  | -0.0000 | -0.0000 | 4.8293  | 0.6112 |
| 4     | -2.0115 | 0.0001  | 0.0000  | 4.0463  | 0.5170 |
| 5     | -0.0001 | -0.3904 | 0.0104  | 0.1525  | 0.0198 |

**Table S5.** Excitation energies and oscillator strengths at B3LYP/6-31G(d,p) level

|                  |                      |           |           |          |              |
|------------------|----------------------|-----------|-----------|----------|--------------|
| Excited State 1: | Singlet-A            | 3.8635 eV | 320.91 nm | f=0.0309 | <S**2>=0.000 |
| 87 -> 90         | -0.16765             |           |           |          |              |
|                  | HOMO(88) -> LUMO(89) | 0.68236   |           |          |              |
| Excited State 2: | Singlet-A            | 4.3356 eV | 285.97 nm | f=0.3913 | <S**2>=0.000 |
| 87 -> 89         | 0.63561              |           |           |          |              |
| 88 -> 90         | 0.28873              |           |           |          |              |
| Excited State 3: | Singlet-A            | 5.1658 eV | 240.01 nm | f=0.6112 | <S**2>=0.000 |
| 85 -> 90         | -0.10104             |           |           |          |              |
| 86 -> 89         | 0.25968              |           |           |          |              |
| 87 -> 89         | -0.17004             |           |           |          |              |
| 87 -> 91         | -0.25071             |           |           |          |              |
| 88 -> 90         | 0.52120              |           |           |          |              |
| 88 -> 92         | -0.21507             |           |           |          |              |
| Excited State 4: | Singlet-A            | 5.2148 eV | 237.75 nm | f=0.5170 | <S**2>=0.000 |
| 86 -> 89         | 0.53904              |           |           |          |              |
| 87 -> 89         | 0.21513              |           |           |          |              |
| 87 -> 91         | -0.25168             |           |           |          |              |
| 88 -> 90         | -0.29784             |           |           |          |              |
| Excited State 5: | Singlet-A            | 5.2996 eV | 233.95 nm | f=0.0198 | <S**2>=0.000 |
| 86 -> 92         | 0.10078              |           |           |          |              |
| 87 -> 90         | 0.56127              |           |           |          |              |
| 87 -> 92         | -0.13577             |           |           |          |              |
| 88 -> 89         | 0.11681              |           |           |          |              |
| 88 -> 91         | 0.35557              |           |           |          |              |
